# Supplementary material
Source: publisher figshare collection journal article supplement (https://acs.figshare.com/ndownloader/files/26029076)
Supplement: Supplementary file 1 [file 26029076]

# Investigating the synergistic interactions of surface immobilized and free natural ocular lubricants for contact lens applications: A comparative study between hyaluronic acid and proteoglycan 4 (Lubricin)

## Authors

Myrto Korogiannaki<sup>1</sup>, Michael Samsom<sup>2</sup>, Austyn Matheson<sup>2</sup>, Karim Soliman<sup>1</sup>, Tannin A. Schmidt<sup>3</sup>, Heather Sheardown<sup>1,\*</sup>

## Affiliations

1. Department of Chemical Engineering, McMaster University, Hamilton, Ontario L8S 4L7, Canada
2. Biomedical Engineering Graduate Program, University of Calgary, Calgary, Alberta T2N 1N4, Canada
3. Biomedical Engineering Department, University of Connecticut Health Center, Farmington, Connecticut 06030, USA

\* **Corresponding Author:** sheardown@mcmaster.ca

This supporting information contains:

Number of pages: 5

Number of figures: 3

Number of tables: 1

## Supporting Information

Figure S1: The effect of the preconditioning step on the *in vitro* boundary lubrication at human cornea-pHEMA and pHEMA-co-TRIS hydrogel disc biointerfaces.

Figure S2: Schematic illustration of (I) rhPRG4 grafting and (II) HA-grafting on the surface of model contact lens materials.

Figure S3: Schematic *in vitro* friction test setup.

Table S1: The composition of artificial tear solution.

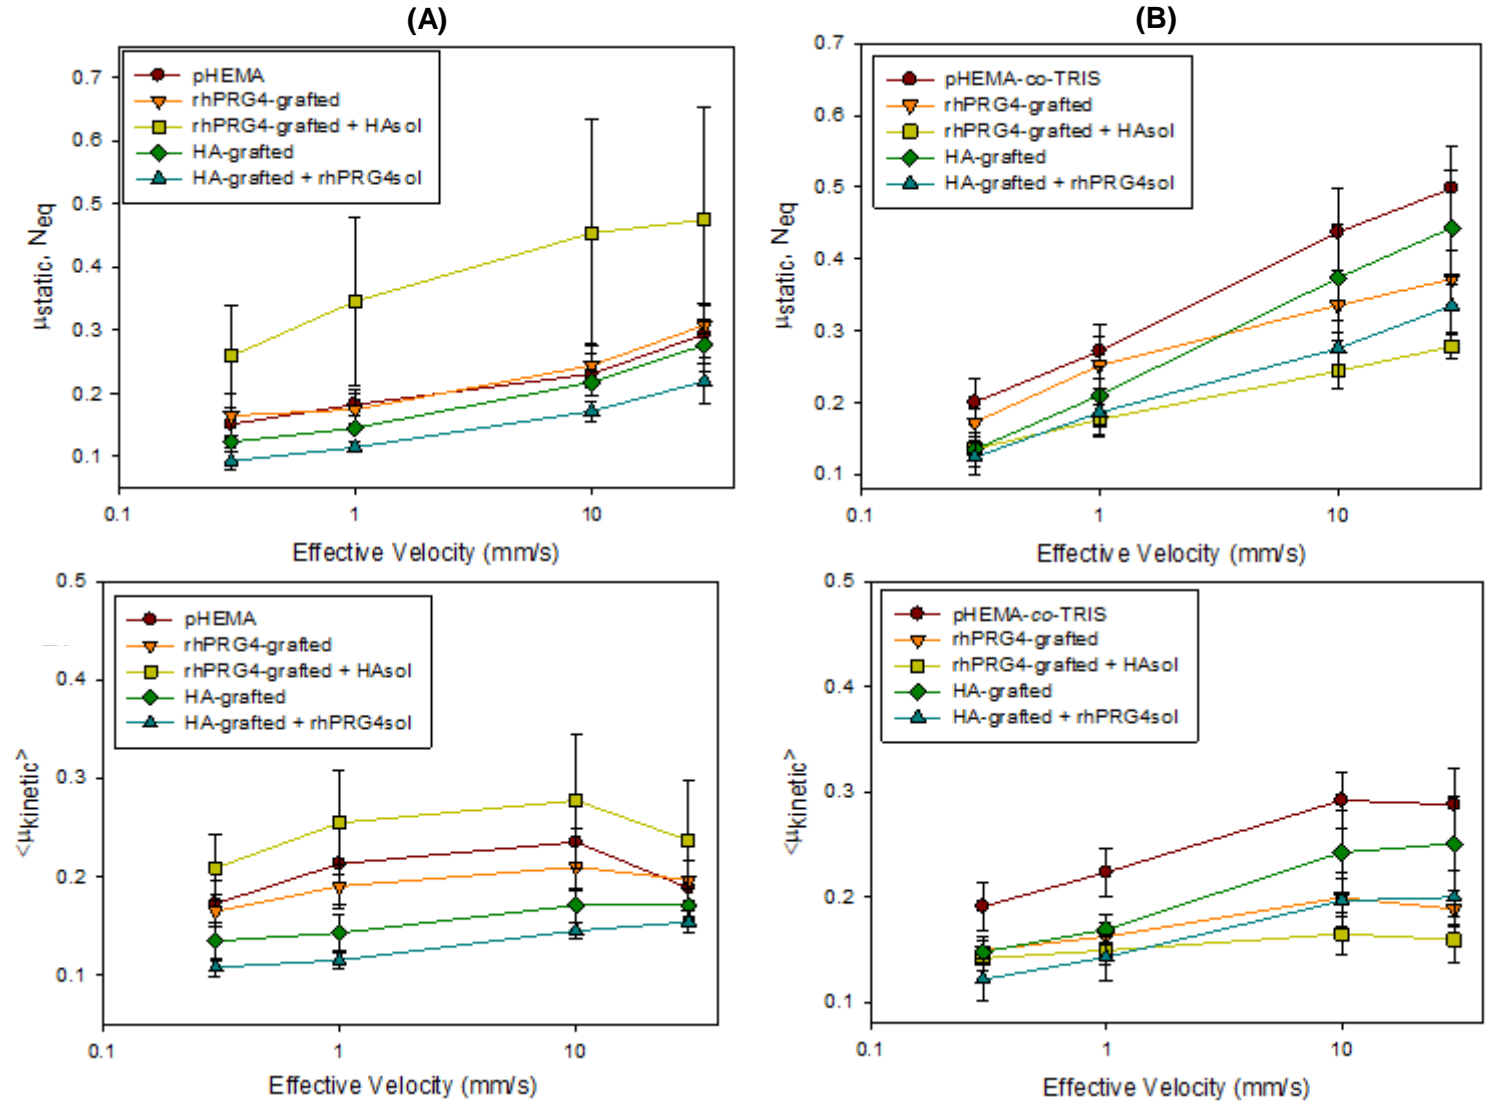

**Fig. S1.** The effect of the preconditioning step on the *in vitro* boundary lubrication at (A) human cornea-pHEMA hydrogel disc biointerface and (B) human cornea-pHEMA-co-TRIS hydrogel disc biointerface. The average normal stress was  $21.4 \pm 4.5$  kPa and  $20.1 \pm 1.9$  kPa, respectively. Sliding velocity values were log transformed to improve the uniformity of variance for statistical analysis. The  $\mu_{static}$  frictional coefficients of the human cornea-disc biointerface were characterized by velocity dependent profiles for both pHEMA and pHEMA-co-TRIS hydrogels ( $p \leq 0.05$ ), whereas no significant differences were detected between the  $\langle \mu_{kinetic} \rangle$  frictional coefficients at different velocities ( $p > 0.05$ ).

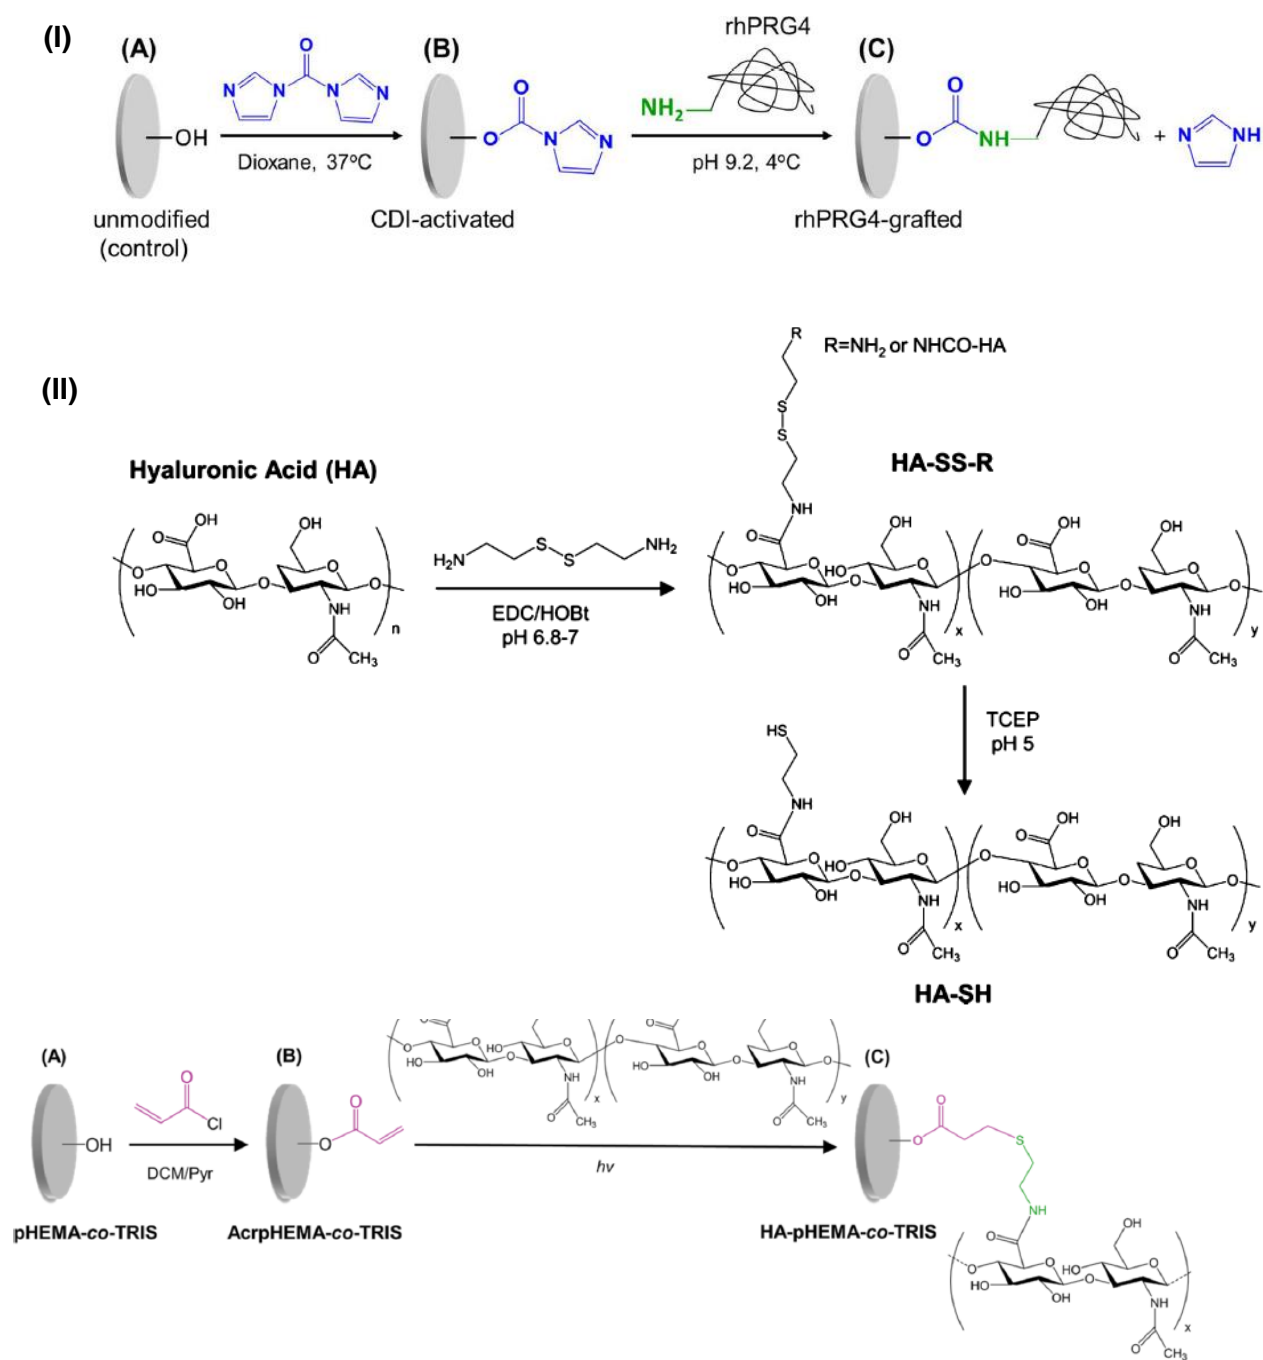

**Figure S2.** Schematic illustration of (I) rhPRG4 grafting and (II) HA-grafting on the surface of model contact lens materials. Reproduced with permissions from (35) and (37), respectively.

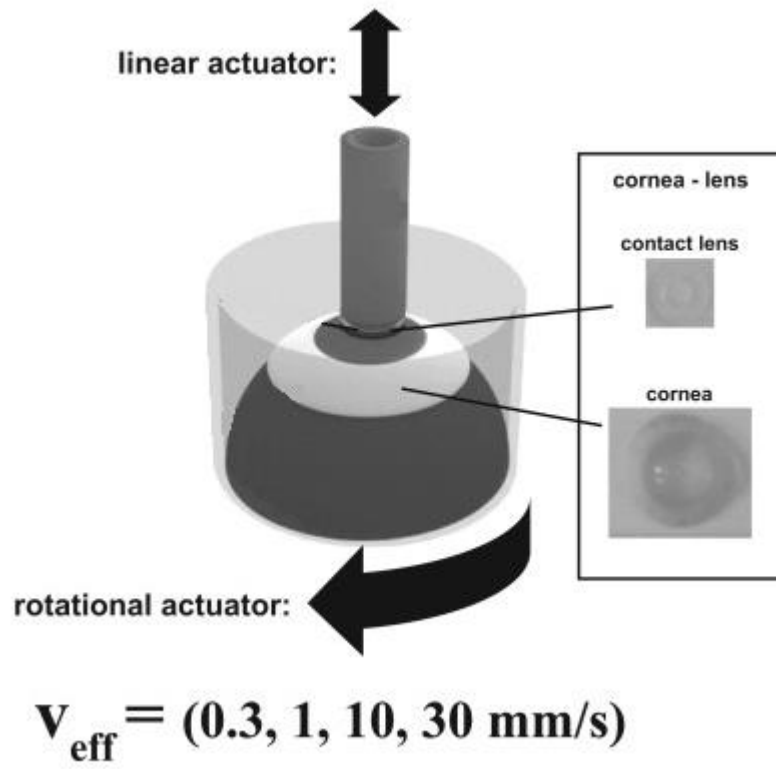

**Figure S3.** Schematic *in vitro* friction test setup, reproduced with permission from (39).

**Table S1.** The composition of the artificial tear solution.

| Salt components          | Concentration<br>(mg/ml)             | Proteins                        | Concentration<br>(mg/ml) |
|--------------------------|--------------------------------------|---------------------------------|--------------------------|
| Sodium chloride          | 5.26                                 | Human serum albumin*            | 0.2                      |
| Potassium chloride       | 1.19                                 | Hen egg lysozyme*               | 1.9                      |
| Sodium carbonate         | 1.27                                 | Bovine colostrum lactoferrin    | 1.8                      |
| Potassium bicarbonate    | 0.30                                 | Bovine $\beta$ -lactoglobulin A | 1.6                      |
| Calcium chloride         | 0.07                                 | Human IgG                       | 0.02                     |
| Trisodium citrate        | 0.44                                 | Bovine submaxillary mucin       | 0.15                     |
| Sodium phosphate dibasic | 3.41                                 |                                 |                          |
| Hydrochloric acid        | 0.94                                 |                                 |                          |
| Glucose                  | 0.036                                |                                 |                          |
| Urea                     | 0.072                                |                                 |                          |
| Proclin 300              | 200 $\mu$ L per liter<br>of solution |                                 |                          |

\* Only one protein at a time was radiolabeled with I<sup>125</sup>. The fraction of the I<sup>125</sup>-labeled protein in both cases was 5% of the desired final concentration.
